# Supplementary material for: Analysis of QTL DM4.1 for Downy Mildew Resistance in Cucumber Reveals Multiple subQTL: A Novel RLK as Candidate Gene for the Most Important subQTL
Source: Front Plant Sci. 2020 Oct 22;11:569876. doi: 10.3389/fpls.2020.569876 (PMC7649820; doi:10.3389/fpls.2020.569876)
Supplement: Supplementary Table 6 — Differential gene expression analysis in fine-mapped DM4.1.2 interval. Expression data of genes within the physical interval of the fine-mapped subQTL DM4.1.2 were analyzed. Pairwise contrasts between genotypes NIL DM4.1.1/.2 and HS279 under both conditions as well as between both conditions for both genotypes are given. Both the Log2 of the fold change and the adjusted P value are given. Additionally, physical locations and annotations per gene are indicated. [file Table_6.xlsx]

## Sheet: Sheet1
					Differential expression between genotypes (NIL DM4.1.1/.2 vs HS279)				Differential expression within genotypes (DM vs Mock)
					P. cubensis inoculated		Mock treated		HS279		NIL DM4.1.1/.2
Gene ID	Start	End	Orientation	Annotation	Log2 of Fold Change	Adjusted P	Log2 of Fold Change	Adjusted P	Log2 of Fold Change	Adjusted P	Log2 of Fold Change	Adjusted P
Csa4M385800.1	15310352	15311706	-	Receptor protein kinase, putative; contains IPR011009 (Protein kinase-like domain)	NA	NA	NA	NA	NA	NA	NA	NA
Csa4M386300.1	15312544	15313305	-	Receptor protein kinase, putative; contains IPR001611 (Leucine-rich repeat), IPR013210 (Leucine-rich repeat-containing N-terminal, type 2)	NA	NA	NA	NA	NA	NA	NA	NA
Csa4M409800.1	15376014	15379127	+	Sterol-C5(6)-desaturase homolog; contains IPR006694 (Fatty acid hydroxylase)	-0.399748	0.605158	-0.0503081	0.968983	-0.924309	0.0767617	-1.27375	0.0131503
Csa4M410800.1	15395680	15396122	-	Vascular plant one zinc finger protein	0.609616	NA	-1.01371	NA	0.414908	0.829351	2.03823	0.246276
Csa4M410810.1	15396124	15397758	-	Putative vascular plant one zinc finger protein	1.46577	NA	-0.272341	NA	-0.876645	0.455751	0.861465	0.397822
Csa4M410820.1	15399773	15407980	-	Abhydrolase domain-containing protein FAM108C1	-0.137144	0.31405	-0.111404	0.588831	-0.360891	0.000562869	-0.386631	0.000168803
Csa4M410830.1	15413955	15420527	-	Putative receptor-like protein kinase; contains IPR011009 (Protein kinase-like domain), IPR013320 (Concanavalin A-like lectin/glucanase, subgroup)	0.695102	0.00683595	-0.0375438	0.95954	3.23357	5.93615e-44	3.96622	1.40111e-66
Csa4M410840.1	15425139	15426485	-	Protein kinase, putative	-1.07727	NA	0	NA	0.785465	NA	0	NA
Csa4M410850.1	15429999	15430244	-	Receptor-like kinase; contains IPR011009 (Protein kinase-like domain)	3.15592	2.57395e-09	3.64231	0.0785038	5.07454	0.000204405	4.58815	8.91911e-12
Csa4M410860.1	15434151	15434423	-	Unknown protein	2.8517	NA	4.52437	NA	4.14186	0.00549581	2.46919	0.000424953
Csa4M410870.1	15442615	15445226	+	Cytochrome P450; contains IPR001128 (Cytochrome P450)	NA	NA	NA	NA	NA	NA	NA	NA
Csa4M410880.1	15452694	15456191	-	MADS box transcription factor; contains IPR002487 (Transcription factor, K-box)	-0.474118	0.562747	-0.549794	0.671765	0.0843012	0.914838	0.159978	0.840431
Csa4M411380.1	15465668	15465898	+	Unknown protein	NA	NA	NA	NA	NA	NA	NA	NA
Csa4M411390.1	15473712	15476323	-	Glycosyltransferase, putative; contains IPR007657 (Glycosyltransferase AER61, uncharacterised)	0.705526	0.00846843	-0.38738	0.466489	3.67514	3.02825e-50	4.76804	1.0583e-80
Csa4M413890.1	15493828	15494223	-	Cytochrome P450; contains IPR001128 (Cytochrome P450)	NA	NA	NA	NA	NA	NA	NA	NA
Csa4M414390.1	15504192	15506460	+	UDP-glycosyltransferase; contains IPR002213 (UDP-glucuronosyl/UDP-glucosyltransferase)	NA	NA	NA	NA	NA	NA	NA	NA
Csa4M414400.1	15507524	15513695	-	Putative nucleolar-protein-domain family protein; contains IPR019186 (Nucleolar protein 12)	0.188511	0.153316	-0.0609117	0.827653	0.400625	0.000370097	0.650047	1.04298e-09
Csa4M414410.1	15516403	15518214	+	Pentatricopeptide repeat-containing protein; contains IPR002885 (Pentatricopeptide repeat), IPR011990 (Tetratricopeptide-like helical)	-1.24337	0.0720739	-0.864097	0.373132	-0.136121	0.83639	-0.515396	0.471339
Csa4M414910.1	15525714	15526001	-	RNA polymerase beta subunit	0.0409378	0.937871	-0.216504	0.74382	-0.675013	0.0364251	-0.417571	0.208736
Csa4M415910.1	15532911	15539290	+	Transcription initiation factor iib, putative; contains IPR000812 (Transcription factor TFIIB), IPR023486 (Transcription factor TFIIB, conserved site)	-0.109851	0.255891	-0.0906029	0.532501	-0.256873	0.000749014	-0.27612	0.000211345
Csa4M415920.1	15549430	15551488	+	UDP-glycosyltransferase; contains IPR002213 (UDP-glucuronosyl/UDP-glucosyltransferase)	0.235589	0.244017	0.826208	1.05957e-05	0.283495	0.126257	-0.307123	0.0546267
Csa4M415930.1	15560183	15562641	-	UDP-glycosyltransferase; contains IPR002213 (UDP-glucuronosyl/UDP-glucosyltransferase)	0	NA	-1.881	NA	-2.03595	NA	0	NA
Csa4M416430.1	15604913	15605964	-	Metacaspase 2; contains IPR011600 (Peptidase C14, caspase catalytic)	-0.309084	0.211912	-0.473203	0.0858114	-0.663707	0.000563151	-0.499587	0.0117226
Csa4M416440.1	15607772	15609427	-	Cupin, RmlC-type; contains IPR014710 (RmlC-like jelly roll fold)	0.0797915	0.551016	0.119882	0.501768	-0.234127	0.0192455	-0.274217	0.00368895
Csa4M416450.1	15615552	15627982	+	Putative FAD-dependent oxidoreductase; contains IPR006076 (FAD dependent oxidoreductase)	0.271888	0.126879	0.359211	0.0764665	-0.303223	0.0541886	-0.390545	0.0050473
Csa4M416460.1	15635345	15635656	+	Unknown protein	-1.07733	NA	1.45995	NA	-0.176266	NA	-2.71355	0.296061
Csa4M416470.1	15636770	15637435	-	Alpha/beta-hydrolase family protein-like protein	NA	NA	NA	NA	NA	NA	NA	NA
Csa4M416480.1	15637269	15643384	+	NADH:cytochrome b5 reductase; contains IPR001433 (Oxidoreductase FAD/NAD(P)-binding), IPR001834 (NADH:cytochrome b5 reductase (CBR)), IPR017938 (Riboflavin synthase-like beta-barrel)	-0.802049	2.4264e-14	0.023698	0.930895	-0.190843	0.0809876	-1.01659	9.52423e-25
Csa4M416980.1	15664479	15665405	-	MYB transcription factor; contains IPR009057 (Homeodomain-like)	-0.342275	0.0621638	0.160378	0.59127	-0.166549	0.341363	-0.669203	6.08691e-06
Csa4M416990.1	15670942	15673212	-	F-box protein SKIP24; contains IPR001810 (F-box domain, cyclin-like)	0.21116	0.290807	-0.0880216	0.82081	-0.0248757	0.909676	0.274306	0.0977161
Csa4M417490.1	15679851	15682201	+	Zinc import ATP-binding protein ZnuC; contains IPR027417 (P-loop containing nucleoside triphosphate hydrolase)	0.0101697	0.955521	0.032701	0.910083	0.15678	0.195067	0.134249	0.255204
Csa4M417500.1	15690345	15692288	-	Presenilin family protein; contains IPR006639 (Peptidase A22, presenilin signal peptide)	0.310129	0.030242	-0.0578436	0.867434	0.321914	0.017968	0.689887	2.28531e-08
Csa4M417510.1	15696313	15699873	+	Protein grpE, putative; contains IPR000740 (GrpE nucleotide exchange factor)	0.0643304	0.802461	0.281061	0.311405	-0.669522	5.74906e-05	-0.886253	2.85309e-08
Csa4M417510.2	15696313	15699873	+	Protein grpE, putative; contains IPR000740 (GrpE nucleotide exchange factor)	0.806417	0.141434	-0.275567	0.758825	-1.35424	0.00232886	-0.272259	0.57034
Csa4M417520.1	15701554	15709996	-	ELMO domain-containing protein A; contains IPR006816 (Engulfment/cell motility, ELMO)	-0.527333	NA	-0.298883	NA	-0.315134	0.725188	-0.543584	0.527969
Csa4M417520.2	15701554	15709996	-	ELMO domain-containing protein A; contains IPR006816 (Engulfment/cell motility, ELMO)	-1.58746	NA	-0.983049	NA	1.29566	NA	0.691244	0.860592
Csa4M418520.1	15716427	15717071	-	Unknown protein; contains IPR005516 (Remorin, C-terminal)	NA	NA	NA	NA	NA	NA	NA	NA
Csa4M418530.1	15721418	15721609	-	Unknown protein	NA	NA	NA	NA	NA	NA	NA	NA
Csa4M418540.1	15722107	15722991	-	Chaperone DnaK; contains IPR013126 (Heat shock protein 70 family)	0.0605799	0.830138	-0.239488	0.523628	0.116885	0.616838	0.416953	0.0329316
Csa4M418550.1	15723045	15723230	-	Chaperone DnaK; contains IPR013126 (Heat shock protein 70 family)	0.232665	0.767479	0.169771	0.906276	0.0615775	0.935005	0.124471	0.85361
Csa4M418560.1	15723262	15725133	-	KRI1-like protein; contains IPR018034 (KRR1 interacting protein 1), IPR024626 (Kri1-like, C-terminal)	-0.0217186	0.903464	0.0919295	0.705164	0.0809832	0.553628	-0.0326649	0.815113
Csa4M418570.1	15733532	15737888	-	Pentatricopeptide repeat-containing protein; contains IPR002885 (Pentatricopeptide repeat), IPR011990 (Tetratricopeptide-like helical)	0.792817	0.0436964	0.00915882	0.993959	0.511083	0.24112	1.29474	0.000291056
