# Supplementary material for: Analysis of QTL DM4.1 for Downy Mildew Resistance in Cucumber Reveals Multiple subQTL: A Novel RLK as Candidate Gene for the Most Important subQTL
Source: Front Plant Sci. 2020 Oct 22;11:569876. doi: 10.3389/fpls.2020.569876 (PMC7649820; doi:10.3389/fpls.2020.569876)
Supplement: Supplementary Table 10 — InterProScan analysis WAK domains. Predicted proteins in the translated cucumber and Arabidopsis genomes were scanned using InterProScan v 5.27 for presence of galacturonan binding and WAK-associated domains. Start and end locations of predicted domains are indicated. [file Table_10.xlsx]

## Sheet: Cucumber WAKL genes
	Wall-associated receptor kinase galacturonan-binding		Wall-associated receptor kinase C-terminal
Gene ID	start of domain	end of domain	start of domain	end of domain
Csa1M024230.1			3	44
Csa1M042480.1	28	134	163	244
Csa1M042490.1	147	222	8	74
Csa1M042500.1	37	137	171	248
Csa1M042510.1	37	137	150	248
Csa1M042530.1			168	238
Csa1M042540.1	36	136	158	247
Csa1M046160.1	31	135
Csa1M059190.1	24	127
Csa2M033280.1	27	125
Csa2M404850.1			470	552
Csa3M119610.1	22	127	158	224
Csa3M171060.1	40	139	223	261
Csa3M603590.1	30	96	176	224
Csa3M603600.1	25	122
Csa3M748160.1	27	130
Csa4M051570.1	29	130	185	224
Csa4M110080.1	26	125
Csa4M296300.1	24	124
Csa4M410830.1			161	229
Csa4M410840.1	36	134	166	233
Csa4M665090.1	43	148
Csa5M604100.1			177	231
Csa6M008740.1	27	125
Csa6M088680.1	27	125
Csa6M095930.1	38	134
Csa6M349850.1	39	143
Csa6M350370.1	43	153
Csa6M351870.1	29	136
Csa6M352870.1	29	137
Csa6M354370.1	29	138
Csa6M403590.1	29	129	222	267
Csa6M513520.1	31	134
Csa7M045520.1	472	557
Csa7M219790.1	30	132

## Sheet: Arabidopsis WAKL genes
		Wall-associated receptor kinase galacturonan-binding		Wall-associated receptor kinase C-terminal
Gene ID	Gene name	start of domain	end of domain	start of domain	end of domain
AT1G10380.1		27	128	212	262
AT1G11915.1		30	134
AT1G16090.1	WAKL7	35	143
AT1G16110.1	WAKL6	40	159
AT1G16120.1	WAKL1	37	154
AT1G16130.1	WAKL2	33	137
AT1G16150.1	WAKL4	33	143
AT1G16160.1	WAKL5	20	139
AT1G16260.1	WAKL8	32	141
AT1G17910.1	WAKL13	25	141
AT1G18390.1	LRK10L1	33	138	162	236
AT1G19390.1	WAKL11	30	141
AT1G21210.1	WAK4	26	124
AT1G21230.1	WAK5	27	125
AT1G21240.1	WAK3	29	129
AT1G21250.1	WAK1	30	128
AT1G21270.1	WAK2	27	126
AT1G25390.1	LRK10L4	25	137
AT1G66880.1				142	208
AT1G66910.1				161	261
AT1G66940.1		38	109	154	222
AT1G67000.1		39	106	143	229
AT1G67025.1		16	79	133	210
AT1G69730.1	WAKL9	31	143
AT1G69910.1		41	129
AT1G79670.1	RFO1|WAKL22	35	147
AT1G79680.1	WAKL10	25	134
AT2G46494.1				143	222
AT2G46495.1		24	95
AT2G46850.1		39	133
AT3G17350.1		29	129	222	259
AT3G53840.1	WAKL15	28	128
AT4G03230.1		436	534
AT4G31100.1	WAKL17	37	142
AT4G31110.1	WAKL18	27	150
AT5G02070.1	WAKL20	41	142
AT5G38210.1	LRK10L3			151	231
AT5G38240.1		40	103
AT5G38250.1		41	139
AT5G38260.1				160	251
AT5G50290.1		21	124
AT5G53110.1		42	133
